# Supplementary material for: Sensitivity of SARS-CoV-2 Variants to Neutralization by Convalescent Sera and a VH3-30 Monoclonal Antibody
Source: PubMed Central journal article supplement (PMC8495157; doi:10.3389/fimmu.2021.751584), 2021-09-23
Supplement: Table_1.pdf [file Table_1.pdf]

**Table S1**

|                                                                 | <b>All (n=28)</b>                     | <b>Severe (n=11)</b>                  | <b>Moderate (n=9)</b>                 | <b>Mild/asymptomatic (n=8)</b>        | <b>Healthy controls (n=6)</b> |
|-----------------------------------------------------------------|---------------------------------------|---------------------------------------|---------------------------------------|---------------------------------------|-------------------------------|
| <b>Age-years (median, IQR)</b>                                  | 58 (43-64)                            | 64 (60-71)                            | 58 (48-63)                            | 31 (18-46)                            | 31 (29-33)                    |
| <b>Gender</b>                                                   |                                       |                                       |                                       |                                       |                               |
| <b>Female</b>                                                   | 17 (60.7%)                            | 4 (36.4%)                             | 7 (77.8%)                             | 6 (75.0%)                             | 2 (33.3%)                     |
| <b>Male</b>                                                     | 11 (39.3%)                            | 7 (63.6%)                             | 2 (22.2%)                             | 2 (25.0%)                             | 4 (66.7%)                     |
| <b>Onset of symptom to sample collection-days (median, IQR)</b> | 23 (15-32)                            | 16 (13-30)                            | 28 (20-33)                            | 31 (18-46)                            | /                             |
| <b>Hospital admission date (medium, IQR)</b>                    | 2020/1/28<br>(2020/1/24 to 2020/3/15) | 2020/1/27<br>(2020/1/24 to 2020/1/31) | 2020/1/25<br>(2020/1/19 to 2020/1/27) | 2020/3/27<br>(2020/3/25 to 2020/4/28) | /                             |
